# Supplementary material
Source: PubMed Central journal article supplement (PMC7147463)
Supplement: NIHMS1560651-supplement-Supporting_Information.pdf [file NIHMS1560651-supplement-Supporting_Information.pdf]

# Supporting Information

## for

# Two-State Three-Mode Parameterization of the Force Field of a Retinal Chromophore Model

Emanuele Marsili<sup>†</sup>, Marwa H. Farag<sup>¶</sup>, Xuchun Yang<sup>%</sup>, Luca De Vico<sup>†</sup>, and Massimo Olivucci<sup>†,%,#,\*</sup>

<sup>†</sup>Dipartimento di Biotecnologie, Chimica e Farmacia, Università di Siena, via A. Moro 2, I-53100 Siena, Italy, <sup>¶</sup>Department of Chemistry, University of Southern California, Los Angeles, CA 90089-0482, USA, <sup>%</sup>Department of Chemistry, Bowling Green State University, Bowling Green, OH 43403, USA and <sup>#</sup>Institut de Physique et Chimie des Matériaux de Strasbourg, UMR 7504 Université de Strasbourg-CNRS, F-67034 Strasbourg, France.

### Contents:

S1: Rigid HOOP ( $\Phi$ ) scan.

S2: Starting values for the fitting procedures.

S3: Deviation between model and dataset.

S4: Energy profiles re-evaluation with expanded 3 states

### S1. Rigid HOOP ( $\Phi$ ) scan

The parameter values shown in Table 1 in the main text are obtained by fitting the full dataset plus additional 144 dataset points obtained via 24 rigid scans along the  $\Phi$  coordinate. To obtain the 144 dataset points we have employed the following protocol. (i) We have picked equally spaced points along the IRC for the MEP<sub>cis</sub>, MEP<sub>trans</sub>, MEP<sub>ct</sub> and MEP<sub>dir</sub> paths (see article, section 1). From the first two paths, we have selected 7 points, while for the last two, we have chosen 5 points (i.e. in total 24). These 24 starting geometries were employed to generate the HOOP scans. (ii) We have performed a rigid scan along the  $\Phi$  coordinate leaving  $r$  and  $\theta$  unchanged. For each starting geometry, we have modified the  $\Phi$  reducing and increasing it of 7, 14 and 21 degrees, generating 6 new geometries that differ only for the  $\Phi$  angle (see Fig. S1). Finally, the generated new points (144 in total) were added to the reference dataset (see point IV of section 2.4 in the main text) to ensure that the model describes properly the  $\Phi$  dependence. Figures S1, S2, S3 and S4 show the relative energies for both ground (in blue), and excited (in red) states for MEP<sub>cis</sub>, MEP<sub>trans</sub>, MEP<sub>ct</sub> and MEP<sub>dir</sub> HOOP-scans, respectively. Each panel of figure S1-S4 has in abscissa the  $\Phi$  value while in ordinates the corresponding energy (zero is assigned to *trans*-PSB3) of each geometry. The reference point (i.e. the starting geometries) is shown in the middle of the plot (notice that it does not always coincide with  $\Phi = 0^\circ$ ). The circles show the computed energies while the squares correspond to the simulated energies. Figure S1 shows the HOOP-scans performed along the MEP<sub>cis</sub> reaction path. It starts with MEP<sub>cis</sub>000, which coincides with FC<sub>cis</sub>, and it ends with MEP<sub>cis</sub>024, a geometry close to the Cl<sub>cis</sub>. Those points in-between belong to the IRC traced on the excited state. They have a structure that evolves gradually from a *cis*-PSB3-like till the first conical intersection (see Gozem, S. et al. Chem. Theory Comput. 2012, 8, 4069-4080 and Gozem, S. et al. J. Chem. Theory Comput. 2013, 9, 4495-4506). Figure S2 shows the HOOP-scans along MEP<sub>trans</sub> reaction path, MEP<sub>trans</sub>000 coincides with Cl<sub>trans</sub> while MEP<sub>trans</sub>024 is a structure close the FC<sub>trans</sub>. Finally Figures S3 and S4 display the HOOP-scans of MEP<sub>ct</sub> and MEP<sub>dir</sub>, respectively. MEP<sub>ct</sub>008 and MEP<sub>dir</sub>008 are the two TSs while the other geometries corresponds with the evolution towards reactant and product structures. It should be noticed that only a small portion of the reaction path is computed, MEP<sub>ct</sub>000 and MEP<sub>dir</sub>000 do not

correspond to the point of minima as well MEPct016 and MEPdir016. We have found that the simulated values fit reasonably well the point calculated at the XMCQDPT2 level of theory especially in the vicinity of the reference points and along the MEPcis and MEPtrans paths (figure S1 and S2). Slightly worse results are obtained for MEPct and MEPdir rigid scans (Figure S3 and S4) where some deviation of 5 kcal/mol and few of them above 7 kcal/mol (see section S3).

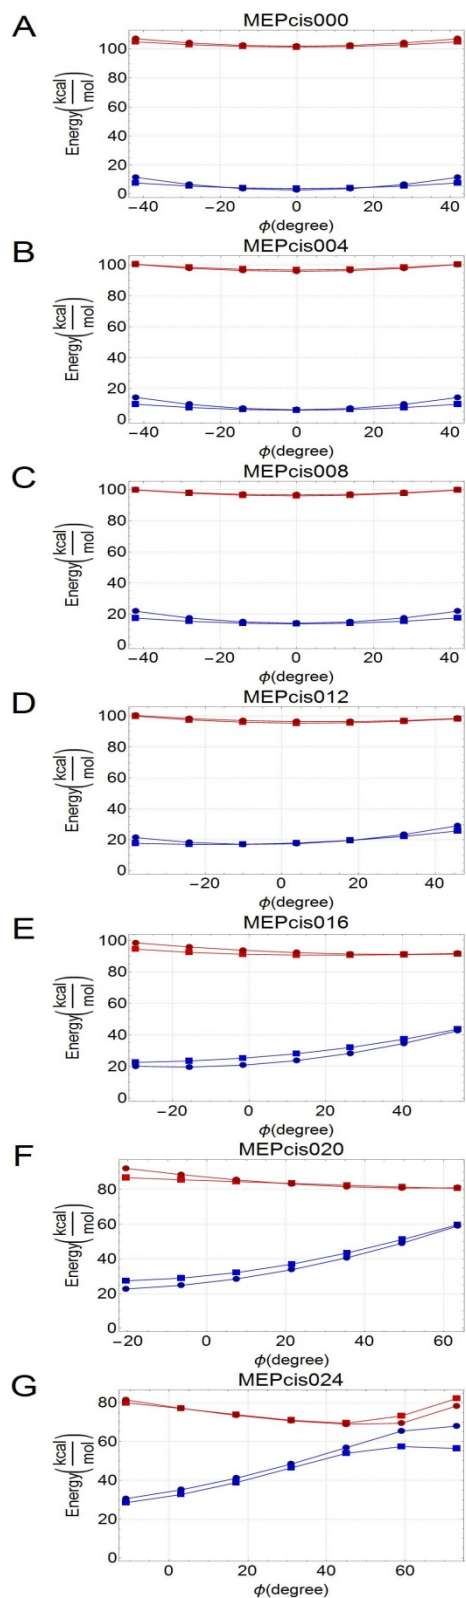

**Figure S1.** MEPcis HOOP scans. MEPcis000 (A) represent the FCcis while MEPcis024 (G) is just before the first conical intersection Clcis.

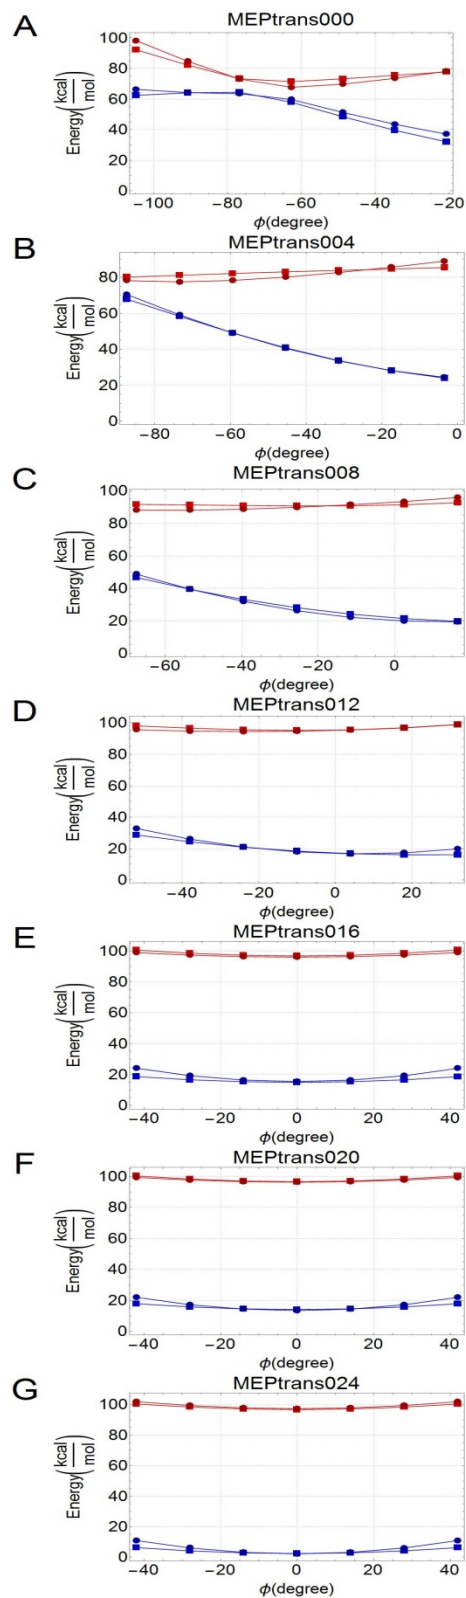

**Figure S2.** MEPtrans HOOP scans. MEPcis000 (A) represent the Cltrans (noticeable is the energy degeneration between  $S_0$  and  $S_1$ ) while MEPcis024 (G) is just before the FCtrans

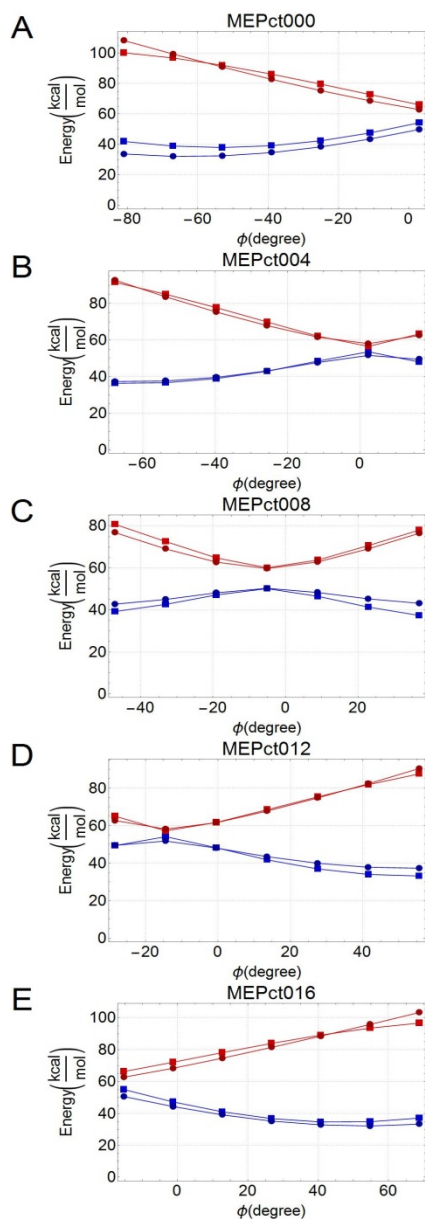

**Figure S3.** MEPct HOOP scans. MEPct000 (A) and MEPct016 (E) represent the ending of the path while MEPct008 (C) middle point is the TS

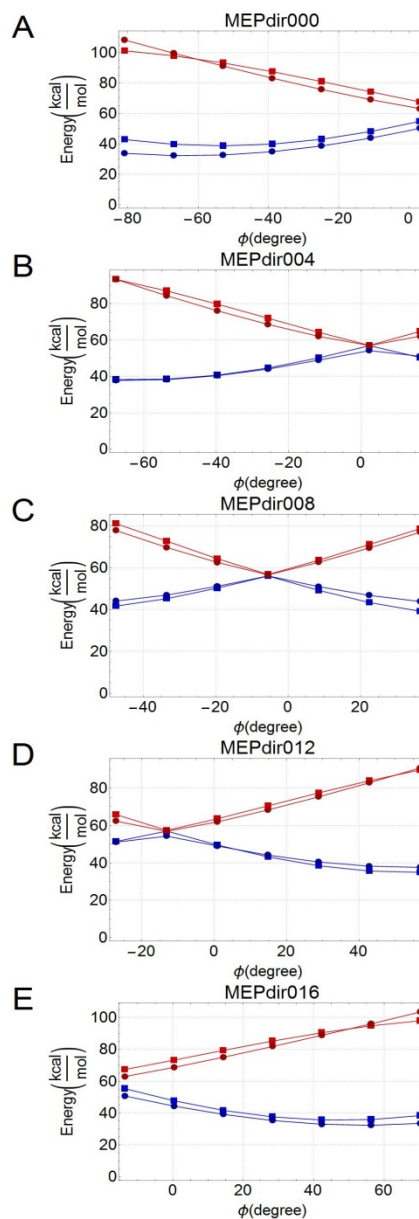

**Figure S4.** MEPdir HOOP scans MEPdir000 (A) and MEPdir016 (E) represent the ending of the path while MEPdir008 (C) is the TS, notice that in this case it coincides with the CI at minimum energy.

## S2. Starting values for the fitting procedures

This test was made to ensure that the result obtained is solid and it does not change for small variations of the starting values. We report in Table S1 three sets of starting values, varying especially those belonging to  $H_{cp}$ ,  $H_{ct_{corr}}$  and  $H_{dir_{corr}}$ , that bring, after optimization via *FindFit* and *NonLinearModelFitting* the same optimized parameters shown in Table 1 (in the main text). Special care must be taken for the selection of  $hc_1$ ,  $hc_2$ ,  $hd_1$  and  $hd_2$ . For instance, the use of negative starting parameters can alter the final fitting result (sometimes obtaining very similar outcome but, in other cases, converging to a local solution yielding an higher standard deviation).

**Table S1.** Three different combination of starting parameters that bring the same result optimized parameter reported in Table 1 in the main article. Other combinations are possible but they are not reported.

|                      | 1    | 2    | 3    |
|----------------------|------|------|------|
| Hdir2D               |      |      |      |
| $d_1$                | 2300 | -40  | 1200 |
| $d_2$                | 50   | 200  | -10  |
| $d_3$                | 3.72 | -10  | 12   |
| $d_4$                | -596 | 1000 | -300 |
| Hct2D                |      |      |      |
| $c_1$                | 500  | 1    | 100  |
| $c_2$                | 6    | 100  | 36   |
| $c_3$                | 0.01 | -25  | 15   |
| $c_4$                | 0.5  | 345  | 30   |
| $c_5$                | 3.5  | 1    | 2    |
| Hdir <sub>corr</sub> |      |      |      |
| $hd_1$               | 40   | 70   | 4    |
| $hd_2$               | 20   | 150  | 60   |
| Hct <sub>corr</sub>  |      |      |      |
| $hc_1$               | 18   | 1    | 30   |
| $hc_2$               | 60   | 10   | 7    |
| Hcp                  |      |      |      |
| $k_1$                | 20   | 10   | 50   |
| $k_2$                | 30   | 1    | -1   |

### S3. Deviation between model and dataset.

In this chapter we discuss, briefly, the energy differences between the energy computed at the XMCQDPT2 and simulated energy values (residuals).

#### S3.1 Result for Hdir2D and Hct2D.

The first two diabatic functions are fitted using 36 dataset points dataset (see section 2.4 in the main text). These functions fit reliably as demonstrated by analyzing the residuals in Figure S5. Panel A and B show the residuals between computed data and Hdir2D and Hct2D, respectively. The absolute energy difference between dataset and simulated values is very low yielding a model with high accuracy making a small error of 1 kcal/mol.

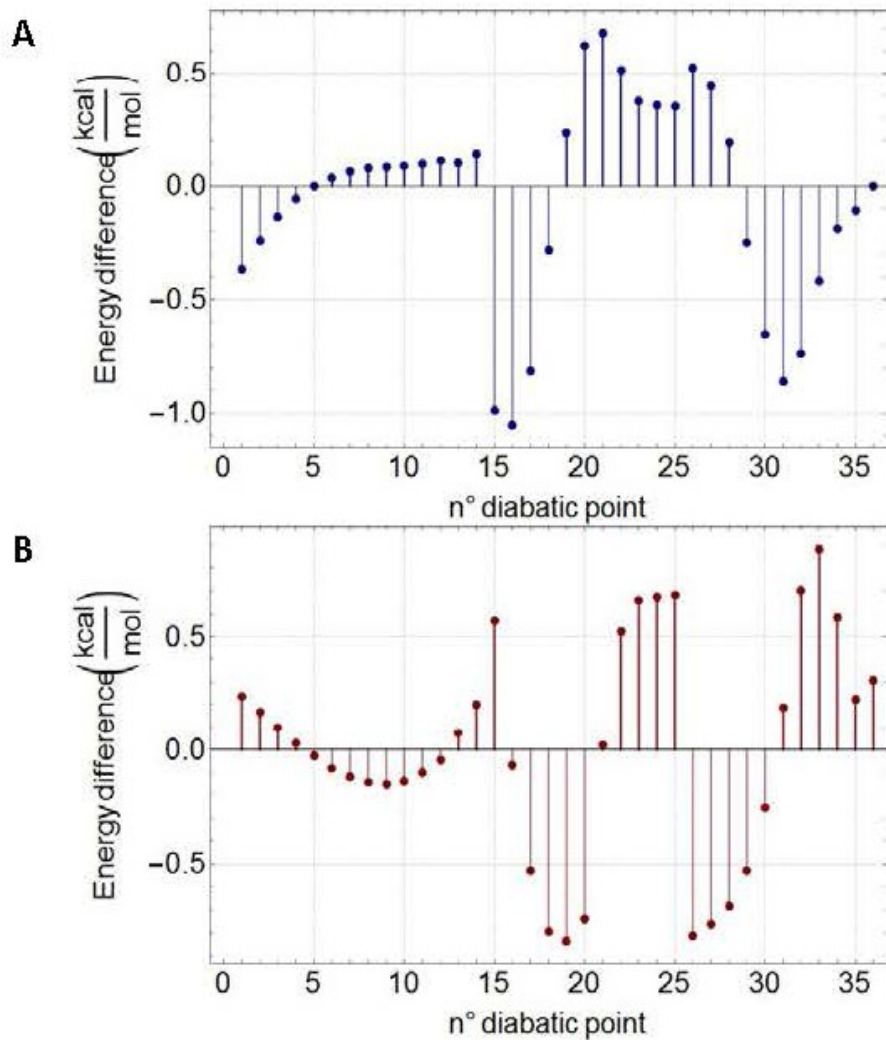

**Figure S5.** Energy residues between computed and simulated points belonging to the diabatic dataset. A and B is referring Hdir2D and Hct2D model respectively.

**Table S2.** Statistical values for the residues displayed in Figure S5.

|                 | <i>Hdir2D</i> | <b>P-value</b>        | <i>Hct2D</i> | <b>P-value</b>        |
|-----------------|---------------|-----------------------|--------------|-----------------------|
| <b>SD</b>       | 0.450         | -                     | 0.484        | -                     |
| <b>Variance</b> | 0.203         | -                     | 0.234        | -                     |
|                 | d1            | $9.44 \cdot 10^{-8}$  | c1           | $1.62 \cdot 10^{-11}$ |
|                 | d2            | $2.80 \cdot 10^{-54}$ | c2           | $1.70 \cdot 10^{-10}$ |
|                 | d3            | $4.05 \cdot 10^{-22}$ | c3           | $4.50 \cdot 10^{-11}$ |
|                 | d4            | $3.20 \cdot 10^{-39}$ | c4           | $5.10 \cdot 10^{-41}$ |
|                 | -             |                       | c5           | $1.04 \cdot 10^{-9}$  |

Statistical values such as Standard Deviation and variance are collated together with reliability parameter (p-value) in Table S2. The p-values show the trustworthiness of each parameter: values lower than 0.05 should be considered accurate. We remind that, for the results interpretation, lower is the p-value, higher is the reliability of one parameter in the model.

### S3.2. Result for $S_0$ and $S_1$ adiabatic states.

The two adiabatic functions are fitted using 257 geometries belonging to the reference dataset plus the 144 points of HOOP scans (see section 2.4, point IV in the main text). To validate the correctness between computed and simulated energies, we report in Figure S6 the residuals, while the same statistical considerations done in section S3.1 (Supporting Information), are reported in Table S3. Standard Error and t-statistic were also determined but are not reported. The model fit with a good agreement the points belong to the six paths while it less accurate for the last 144 HOOP-scan points in both  $S_0$  (Figure S6 panel A) and  $S_1$  (Figure S6 panel B).

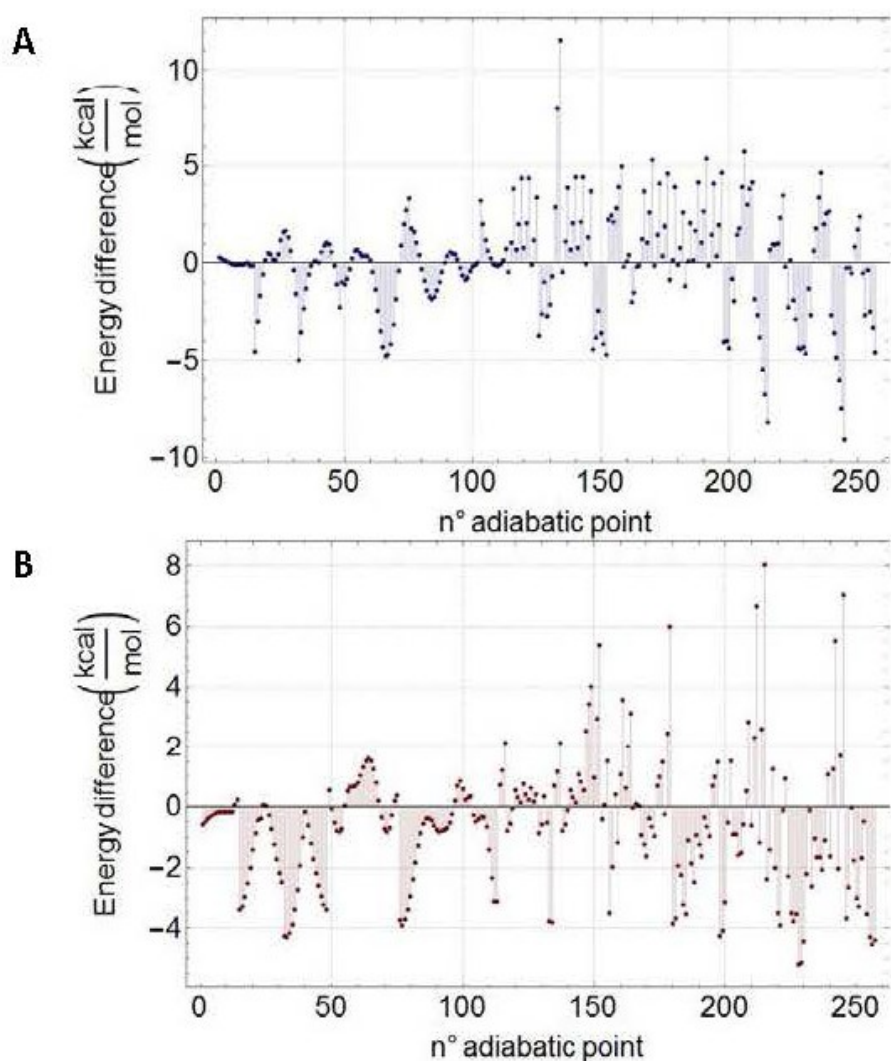

**Figure S6.** Energy residues between computed and simulated points belonging to the adiabatic dataset. The first 257 (panel A) and the last 257 (panel B) points are the residues between the computed energy reference and  $S_0$  and  $S_1$  adiabatic states simulated by the model, respectively. All points are used for the fitting simultaneously.

**Table S3.** Statistical values for the residues displayed in Figure S6.

|                      | <i>Adiabatic States</i> | <b>P-value</b>         |
|----------------------|-------------------------|------------------------|
| <b>SD</b>            | 2.42                    | -                      |
| <b>Variance</b>      | 5.87                    | -                      |
| Hdir <sub>corr</sub> | hd <sub>1</sub>         | 1.20 10 <sup>-38</sup> |
|                      | hd <sub>2</sub>         | 3.27 10 <sup>-65</sup> |
| Hct <sub>corr</sub>  | hc <sub>1</sub>         | 2.44 10 <sup>-14</sup> |
|                      | hc <sub>2</sub>         | 1.22 10 <sup>-25</sup> |
| Hcp                  | k <sub>1</sub>          | 4.15 10 <sup>-59</sup> |
|                      | k <sub>2</sub>          | 5.46 10 <sup>-18</sup> |

#### S4. Energy profiles re-evaluation with expanded 3 states

The energy profiles along the six paths in this work (see Figure 3) were obtained at the 2-root state average XMCQDPT2//CAS(2,2)/6-31G\* level. To confirm that such results are not affected significantly by higher excited states, we re-evaluated the path energy profiles at the 3-root state average XMCQDPT2//CAS(3,3)/6-31G\* level. The obtained energy profiles, as displayed in Figure S7, shows that the second excited state  $S_2$  is well separated from  $S_1$  along all six paths, and there is no obvious difference of the  $S_0$  and  $S_1$  energy profiles between the 2-root and 3-root result, indicating that  $S_2$  is not interfering with  $S_1$  and  $S_0$ .

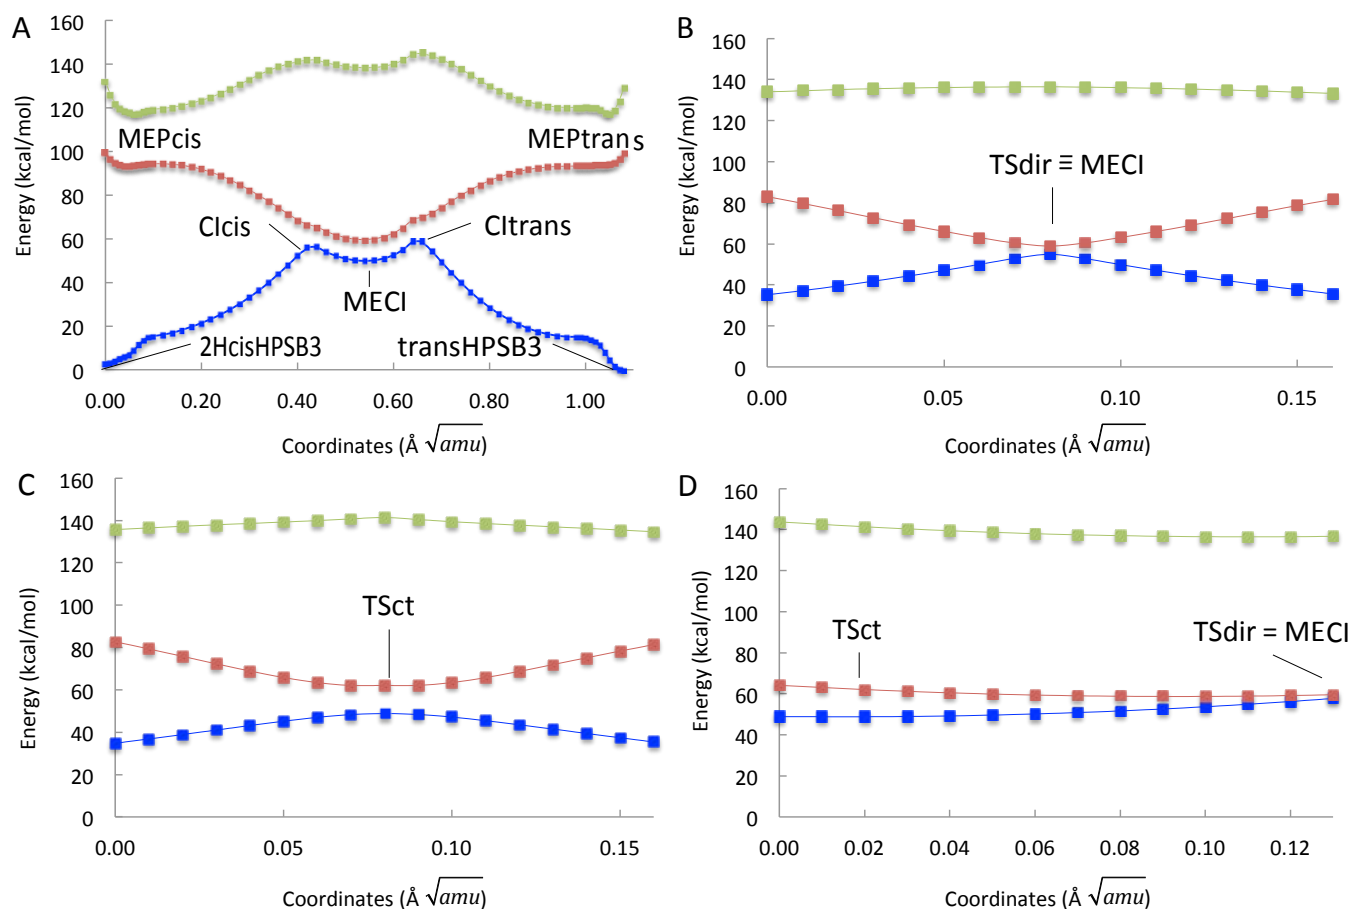



**Figure S7.** Simulated (squares) adiabatic energy profiles along the six paths considered in this work at 3-roots state average XMCQDPT2//CASSCF/6-31G\* level.  $S_0$ ,  $S_1$  and  $S_2$  profiles are in blue, red and green, respectively. A. MEPcis, MEPtrans and connecting IS profiles. The points include the 2-cis-PSB3 and all-trans-PSB3 equilibrium structures and the Clcis, Cltrans and MECI conical intersections, B. MEPdir including the transition state TSdir. C. MEPct including the transition state TSct. D. BLAP energy including TSdir, TSct and MECI.
